# Supplementary material for: National Trends in Outpatient Mental Health Service Use Among Adults Between 2008 and 2015
Source: Atypon-hosted journal article supplement (doi:10.1176/appi.ps.201900576), 2020-09-10
Supplement: appi.ps.201900576.ds001.pdf [file appi.ps.201900576.ds001.pdf]

**Online Supplement. Trends in Outpatient Mental Health Visits Stratified by Demographic Groups**

| Mental Health Visits by Provider Type (%) | Adjusted Difference between 2008-2011 and 2012-2015 |         |           |         |         |                    |                    |        |          |                          |         |
|-------------------------------------------|-----------------------------------------------------|---------|-----------|---------|---------|--------------------|--------------------|--------|----------|--------------------------|---------|
|                                           | Gender                                              |         | Age Group |         |         | Race/Ethnicity     |                    |        |          | Household Income (% FPL) |         |
|                                           | Male                                                | Female  | 18-39     | 40-64   | >=65    | Non-Hispanic White | Non-Hispanic Black | Other  | Hispanic | <200%                    | >=200%  |
| <b>All Respondents</b>                    |                                                     |         |           |         |         |                    |                    |        |          |                          |         |
| Any mental health visit                   | 0.80**                                              | 1.86*** | 1.15***   | 1.36*** | 1.73*** | 1.63***            | 1.46***            | -0.47  | 0.86**   | 1.00***                  | 2.10*** |
| Any mental health visit with PCP          | 0.25                                                | 0.17    | 0.32      | 0.1     | 0.24    | 0.27               | 0.33               | -0.71* | 0.3      | 0.07                     | 0.53*   |
| Any mental health visit with SMHP         | 0.38                                                | 1.02*** | 0.37      | 0.90*** | 0.96*** | 0.81***            | 0.90***            | -0.1   | 0.51*    | 0.49*                    | 1.17*** |
| Mental health visits with PCP only        | 0.23                                                | 0.15    | 0.35*     | 0.01    | 0.25    | 0.25               | 0.22               | -0.51  | 0.22     | 0.1                      | 0.37    |
| Mental health visits with SMHP only       | 0.35                                                | 1.00*** | 0.41      | 0.81*** | 0.97*** | 0.79***            | 0.79***            | 0.1    | 0.44*    | 0.53**                   | 1.01*** |
| Visits with PCP and SMHP                  | 0.02                                                | 0.02    | -0.04     | 0.09    | -0.01   | 0.02               | 0.1                | -0.2   | 0.08     | -0.04                    | 0.16    |
| Visits with other provider only           | 0.20*                                               | 0.69*** | 0.43***   | 0.45*** | 0.52**  | 0.58***            | 0.34***            | 0.14   | 0.12     | 0.40***                  | 0.56*** |
| <b>Mental Health Services Users</b>       |                                                     |         |           |         |         |                    |                    |        |          |                          |         |
| Visits with PCP only                      | 0.46                                                | -4.48** | 0.98      | -4.00** | -8.63** | -2.71*             | -1.73              | -8     | -0.84    | -2.63                    | -2.92   |
| Visits with SMHP only                     | -1.56                                               | 1.09    | -3.21     | 1.21    | 6.27    | -0.05              | -1.84              | 6.6    | 0.26     | 0.42                     | -0.24   |
| Visits with both PCP and SMHP             | -0.67                                               | -1.13   | -1.57     | -0.22   | -2.3    | -1.06              | -0.23              | -3.73  | 0.38     | -1.41                    | -0.21   |
| Visits with other provider only           | 1.78                                                | 4.52*** | 3.80**    | 3.01*   | 4.66    | 3.81***            | 3.80*              | 5.12   | 0.2      | 3.62**                   | 3.37*   |

---

Data are from the Medical Expenditure Panel Survey (MEPS). MEPS pooled person weights are used to calculate means and totals. Primary care physician specialties include family medicine, general practitioner, general internists, general pediatricians, and OBGYN. Specialty mental health providers include psychiatrists, psychologists, and social workers. Other providers include other physician specialties, nurse practitioners, and other provider types (e.g., PA, LPN). Differences and their significance levels are calculated using linear regressions with MEPS survey weights, strata, and primary sampling units. Differences are adjusted for gender, age group, race/ethnicity, and income, excluding the demographic upon which the sample is stratified. \*  $p < 0.05$  \*\*  $p < 0.01$  \*\*\*  $p < 0.001$

Online Supplement. Derivation of Study Measures from MEPS-Household Component Survey

| Measure                             | Survey Question                                                                                                                                                                                                                                                                                                                                                                                                                                                                                                                                                |
|-------------------------------------|----------------------------------------------------------------------------------------------------------------------------------------------------------------------------------------------------------------------------------------------------------------------------------------------------------------------------------------------------------------------------------------------------------------------------------------------------------------------------------------------------------------------------------------------------------------|
| Provider Type/Specialty             | <p>Did you/PERSON visit PROVIDER on VISIT DATE in person or was this a telephone call? And What type of medical person did you/PERSON talk to on VISIT DATE? With options including: Psychologist, social worker, nurse/nurse practitioner.</p> <p>"It also establishes whether the person saw or spoke to a medical doctor (SEEDOC). If the person did not see a specialty doctor (DRSPLTY), or, if the person did not see a physician (i.e., medical doctor), the respondent was asked to identify the type of medical person that was seen (MEDPTYPE)."</p> |
| Type of Care                        | <p>"Which category best describes the care {you/{PERSON}} received during the visit to {PROVIDER} on {VISIT DATE}" with multiple choices of category including: psychotherapy or mental health counseling</p>                                                                                                                                                                                                                                                                                                                                                  |
| Psychotropic Medication information | <p>During this {visit/telephone call}, were any medicines prescribed for {you/{PERSON}}? Please include only prescriptions which were filled. With options: Yes, No and</p> <p>Please tell me the names of the prescriptions from this {visit/telephone call} that were filled.</p>                                                                                                                                                                                                                                                                            |
